# Supplementary material
Source: PubMed Central journal article supplement (PMC3601037)

**Figure S1**

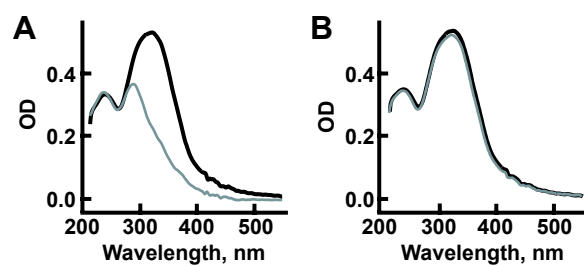

Figure S2

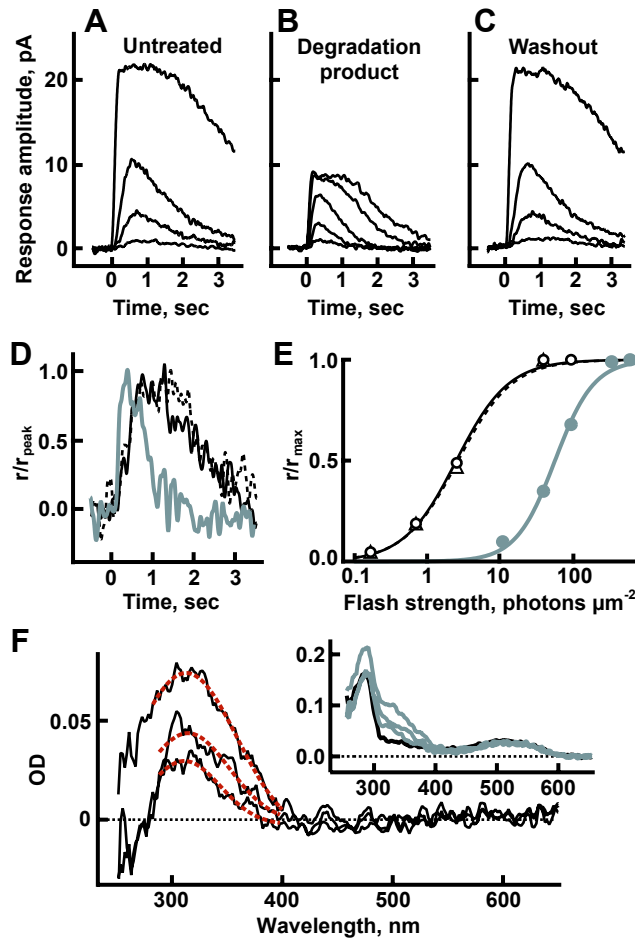

# Figure S3

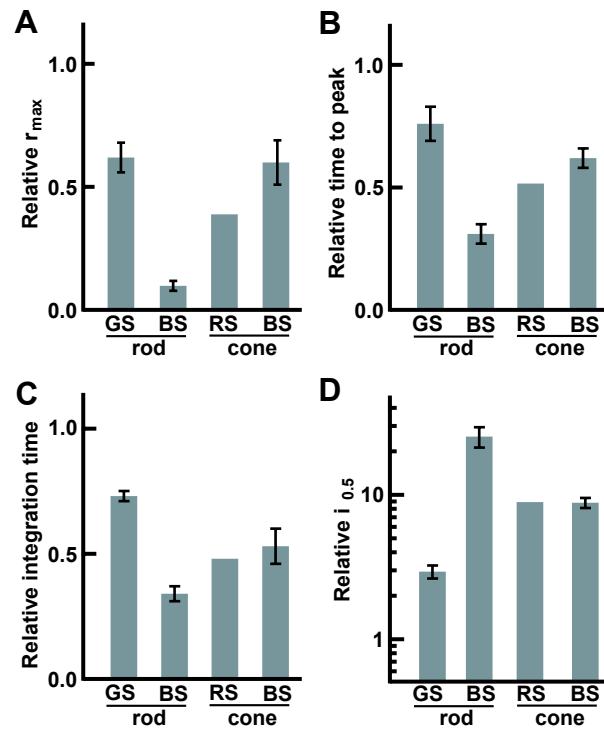

Figure S4

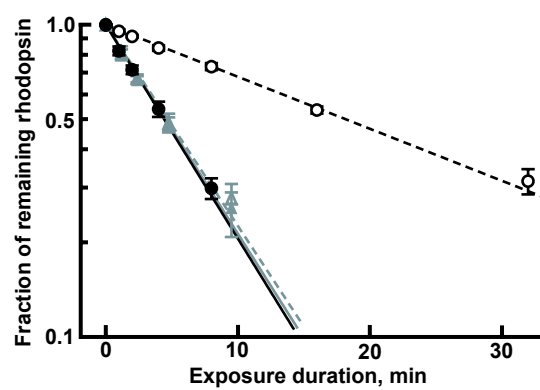

Supplement: NIHMS438644-supplement-Supplemental_Figures.pdf [file NIHMS438644-supplement-Supplemental_Figures.pdf]
